# Supplementary material
Source: PubMed Central journal article supplement (PMC10630966)
Supplement: NIHMS1932079-supplement-MMC1.pdf [file NIHMS1932079-supplement-MMC1.pdf]

**Molecular Cell, Volume 83**

**Supplemental information**

**Implications of a multiscale structure  
of the yeast nuclear pore complex**

**Christopher W. Akey, Ignacia Echeverria, Christna Ouch, Iona Nudelman, Yi Shi, Junjie Wang, Brian T. Chait, Andrej Sali, Javier Fernandez-Martinez, and Michael P. Rout**

## **Supplemental Information**

### **Implications of a multiscale structure of the yeast Nuclear Pore Complex**

*Christopher W. Akey, Ignacia Echeverria, Christna Ouch, Ilona Nudelman, Yi Shi, Junjie Wang, Brian T. Chait, Andrej Sali, Javier Fernandez-Martinez and Michael P. Rout*

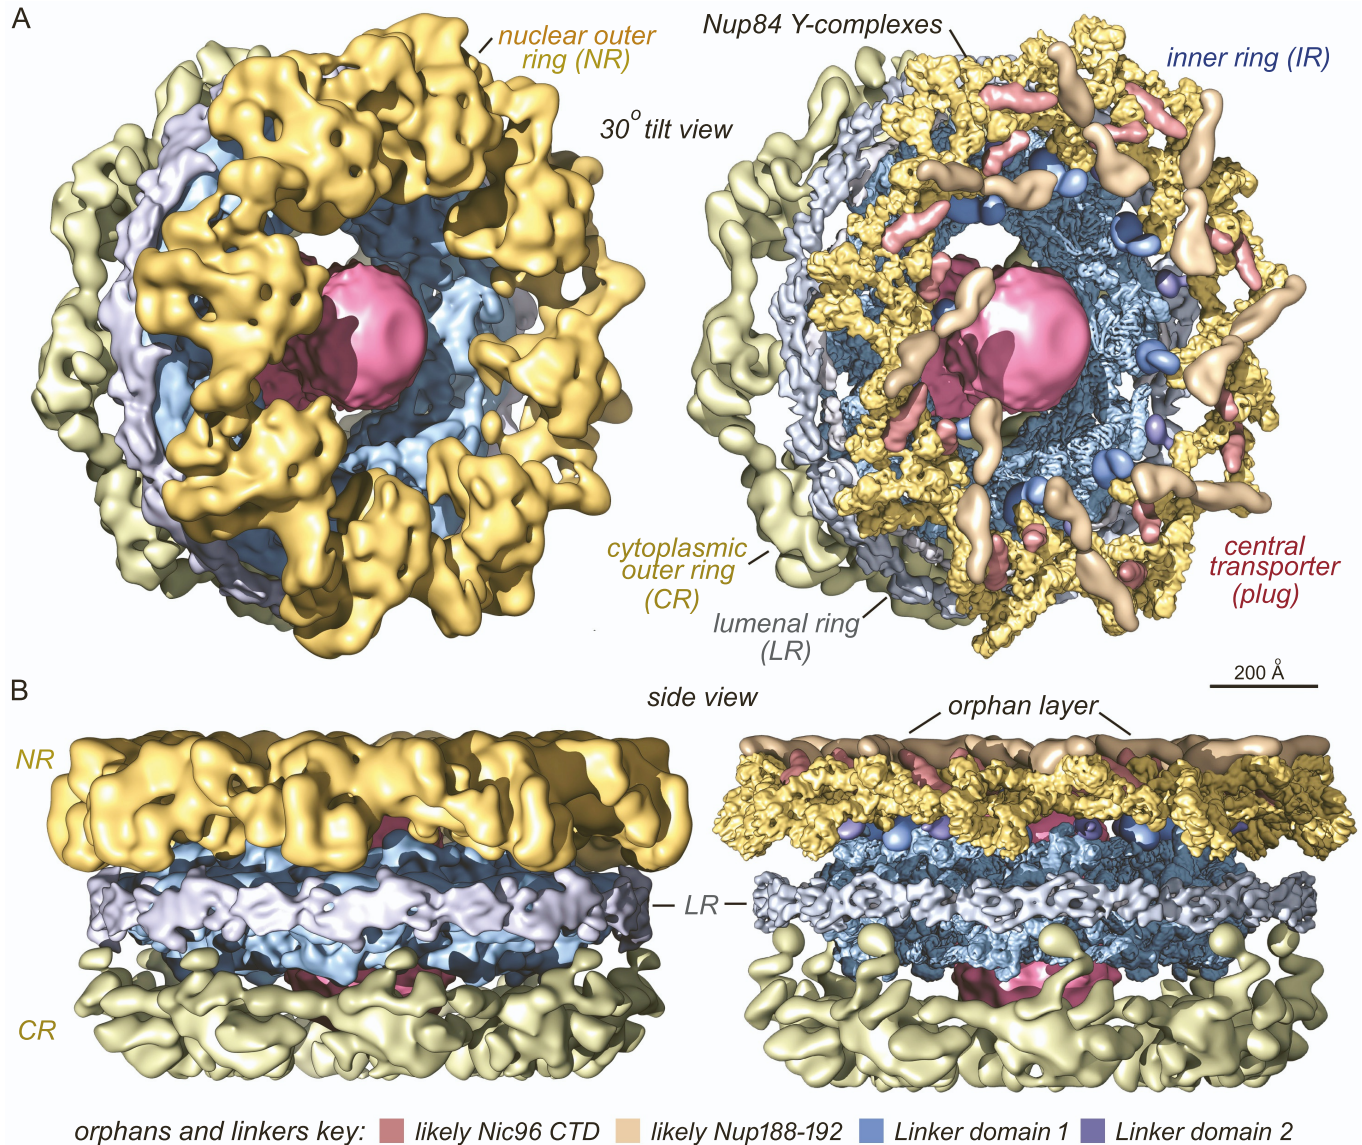

**Figure S1. A step back is a step forward: composite structures of the yeast NPC are shown as isosurfaces with lower resolution 3D maps on the left and intermediate resolution maps on the right, related to Figures 1, 2, 4, 5.**

**(A)** NPC images are shown with a counter clockwise rotation of 30 degrees from a face-on, nuclear view.

**(B)** Composite structures viewed from the pore membrane. Individual rings and sub-assemblies are color coded as indicated in the key.

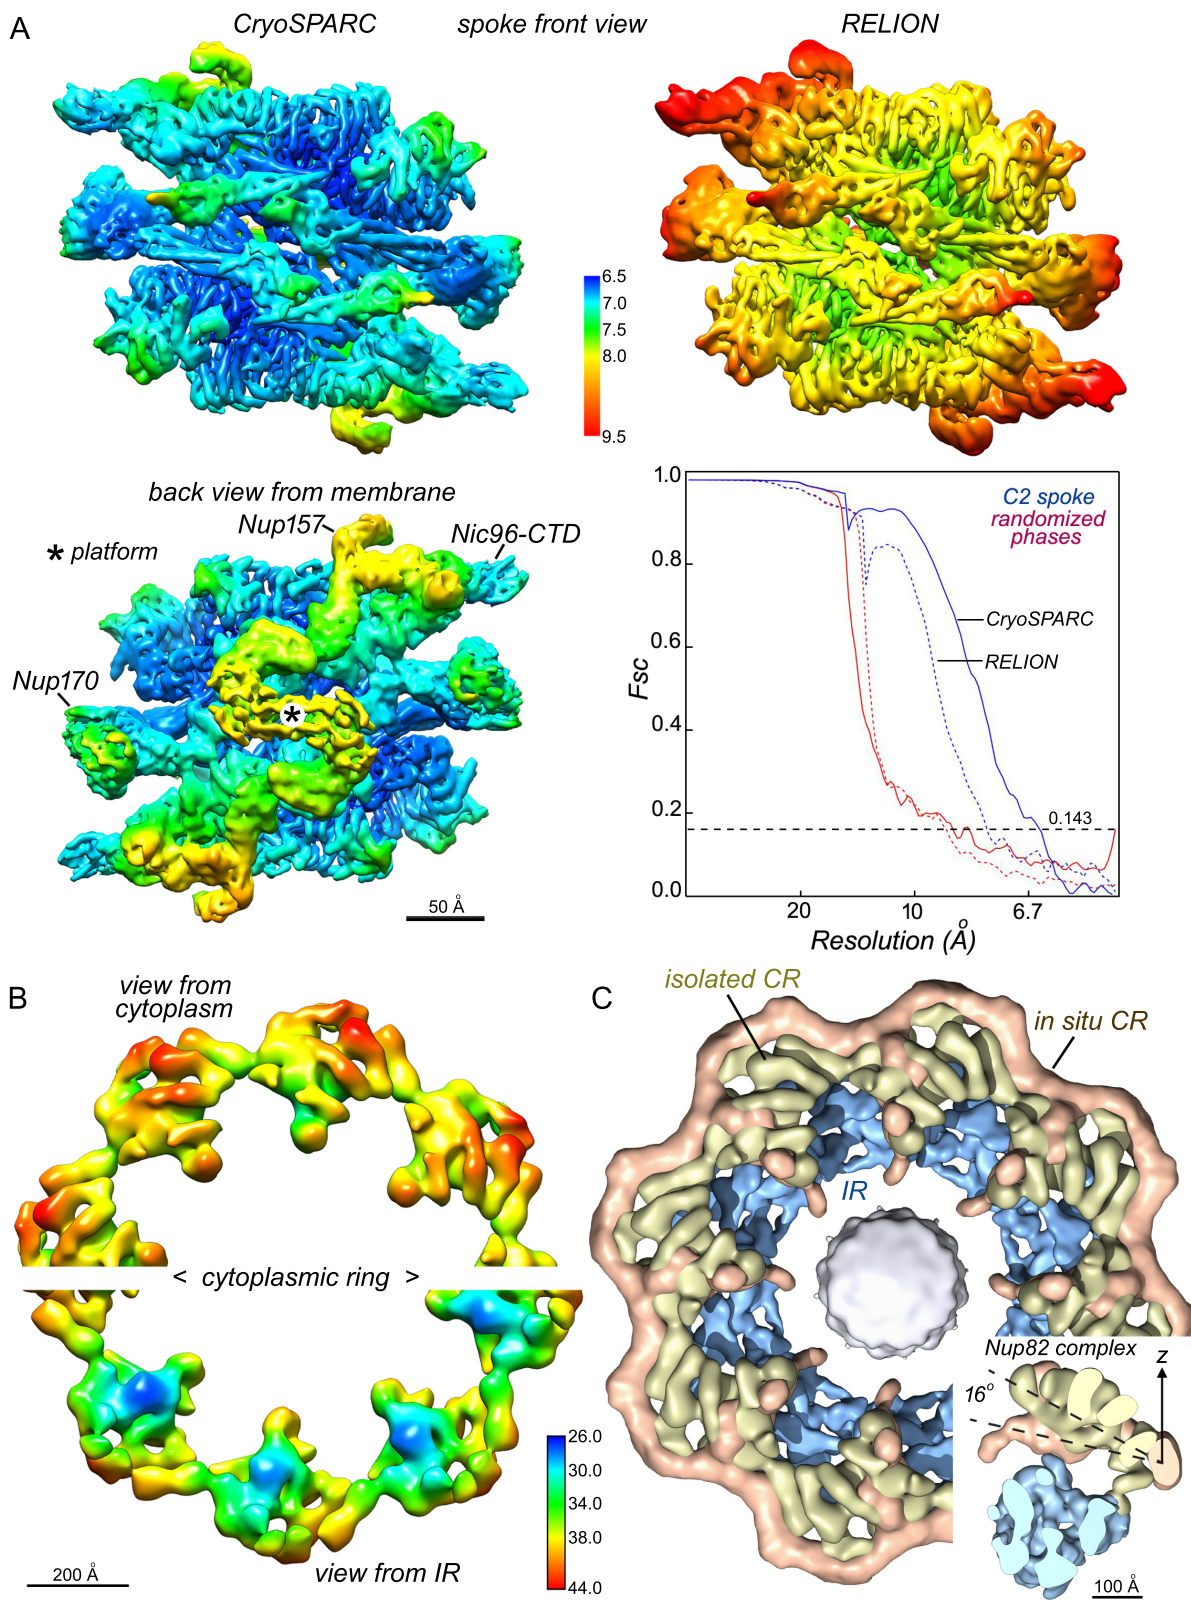

**Figure S2. Resolution of the spoke and characterization of the cytoplasmic outer ring, related to Figures 1, 2.**

**(A)** (top row) Local resolution maps for a single spoke. A side-by-side comparison is shown on the same resolution scale for 3D maps calculated in CryoSPARC (left) and RELION (right). (bottom row: left) A resolution gradient is present as the spoke approaches the micelle ring, whose position is indicated by an incomplete, platform-like feature (asterisk) for the Pom34-Pom152 TMDs. (bottom row: right) FSC curves for spoke maps.

**(B)** (top) Local resolution map for half of the cytoplasmic outer ring viewed from the cytoplasm. (bottom) A nuclear view with the half ring flipped by 180 degrees about the X-axis.

**(C)** The cytoplasmic outer ring from the isolated NPC (bronze) is ~15% smaller in diameter than its *in situ* counterpart (shown in brown). Inset: Isolated and *in situ* cytoplasmic rings are viewed from the side to reveal a vertical rotation of the density for a Nup82 complex dimer.

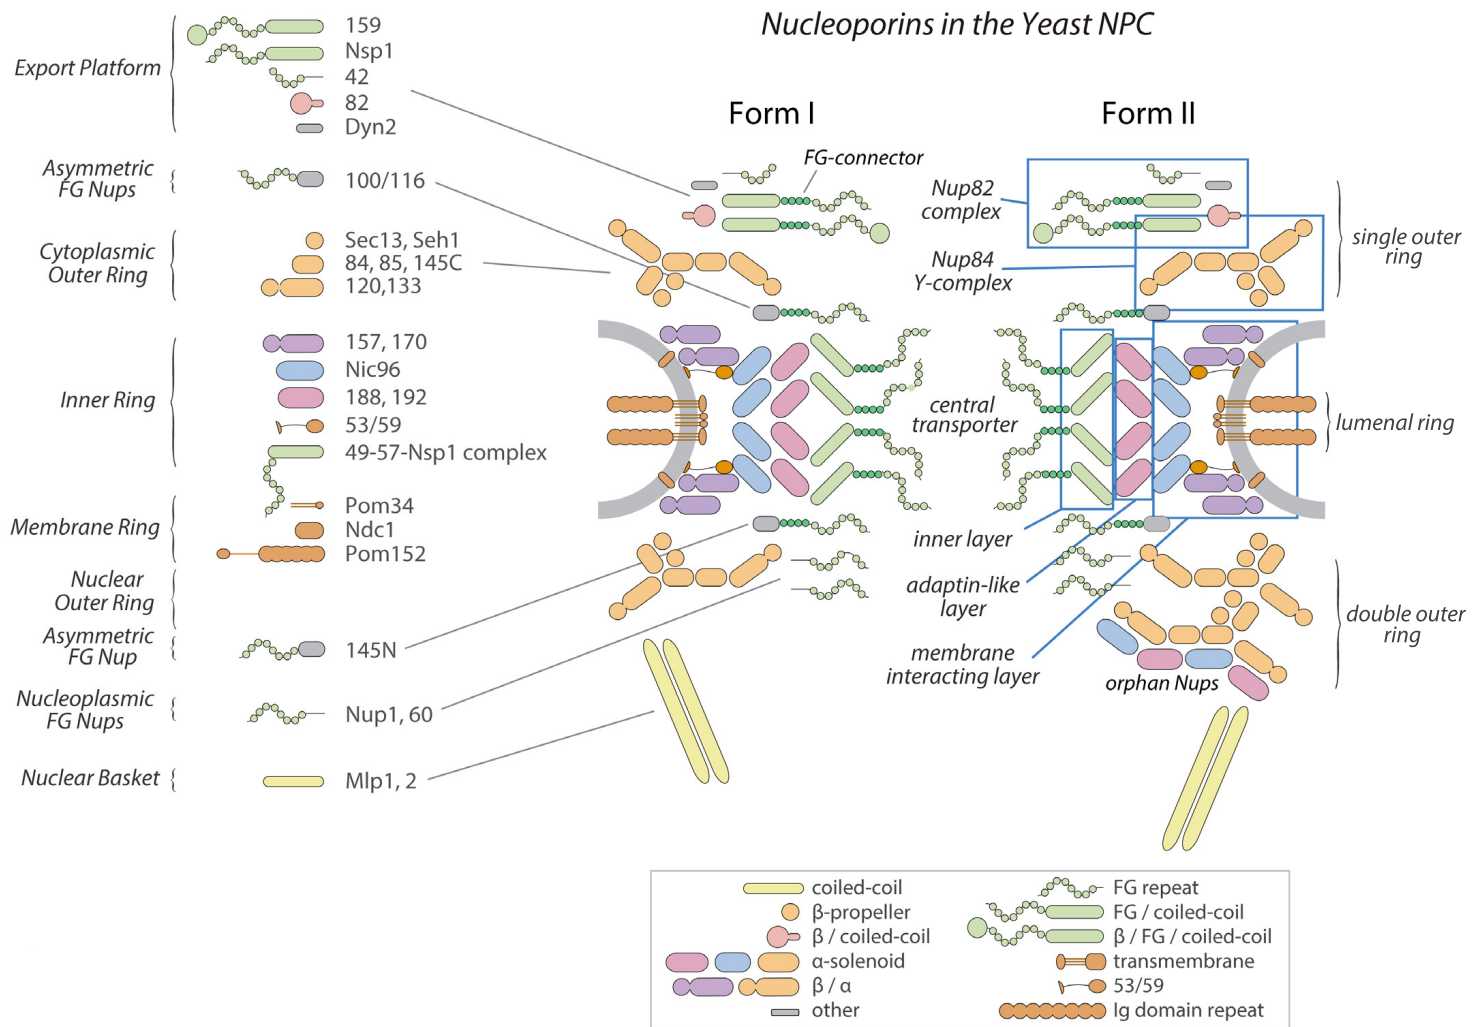

**Figure S3. Diagram for Nups in Form I and Form II yeast NPCs, related to Figures 2, 4, 5.**

FG-connectors are shown as a string of dark green circles that lead into the more flexible FG-repeats (light green). Individual sub-assemblies and functional regions are indicated in blue boxes and are labeled. Protein characteristics are categorized in the color coded key.

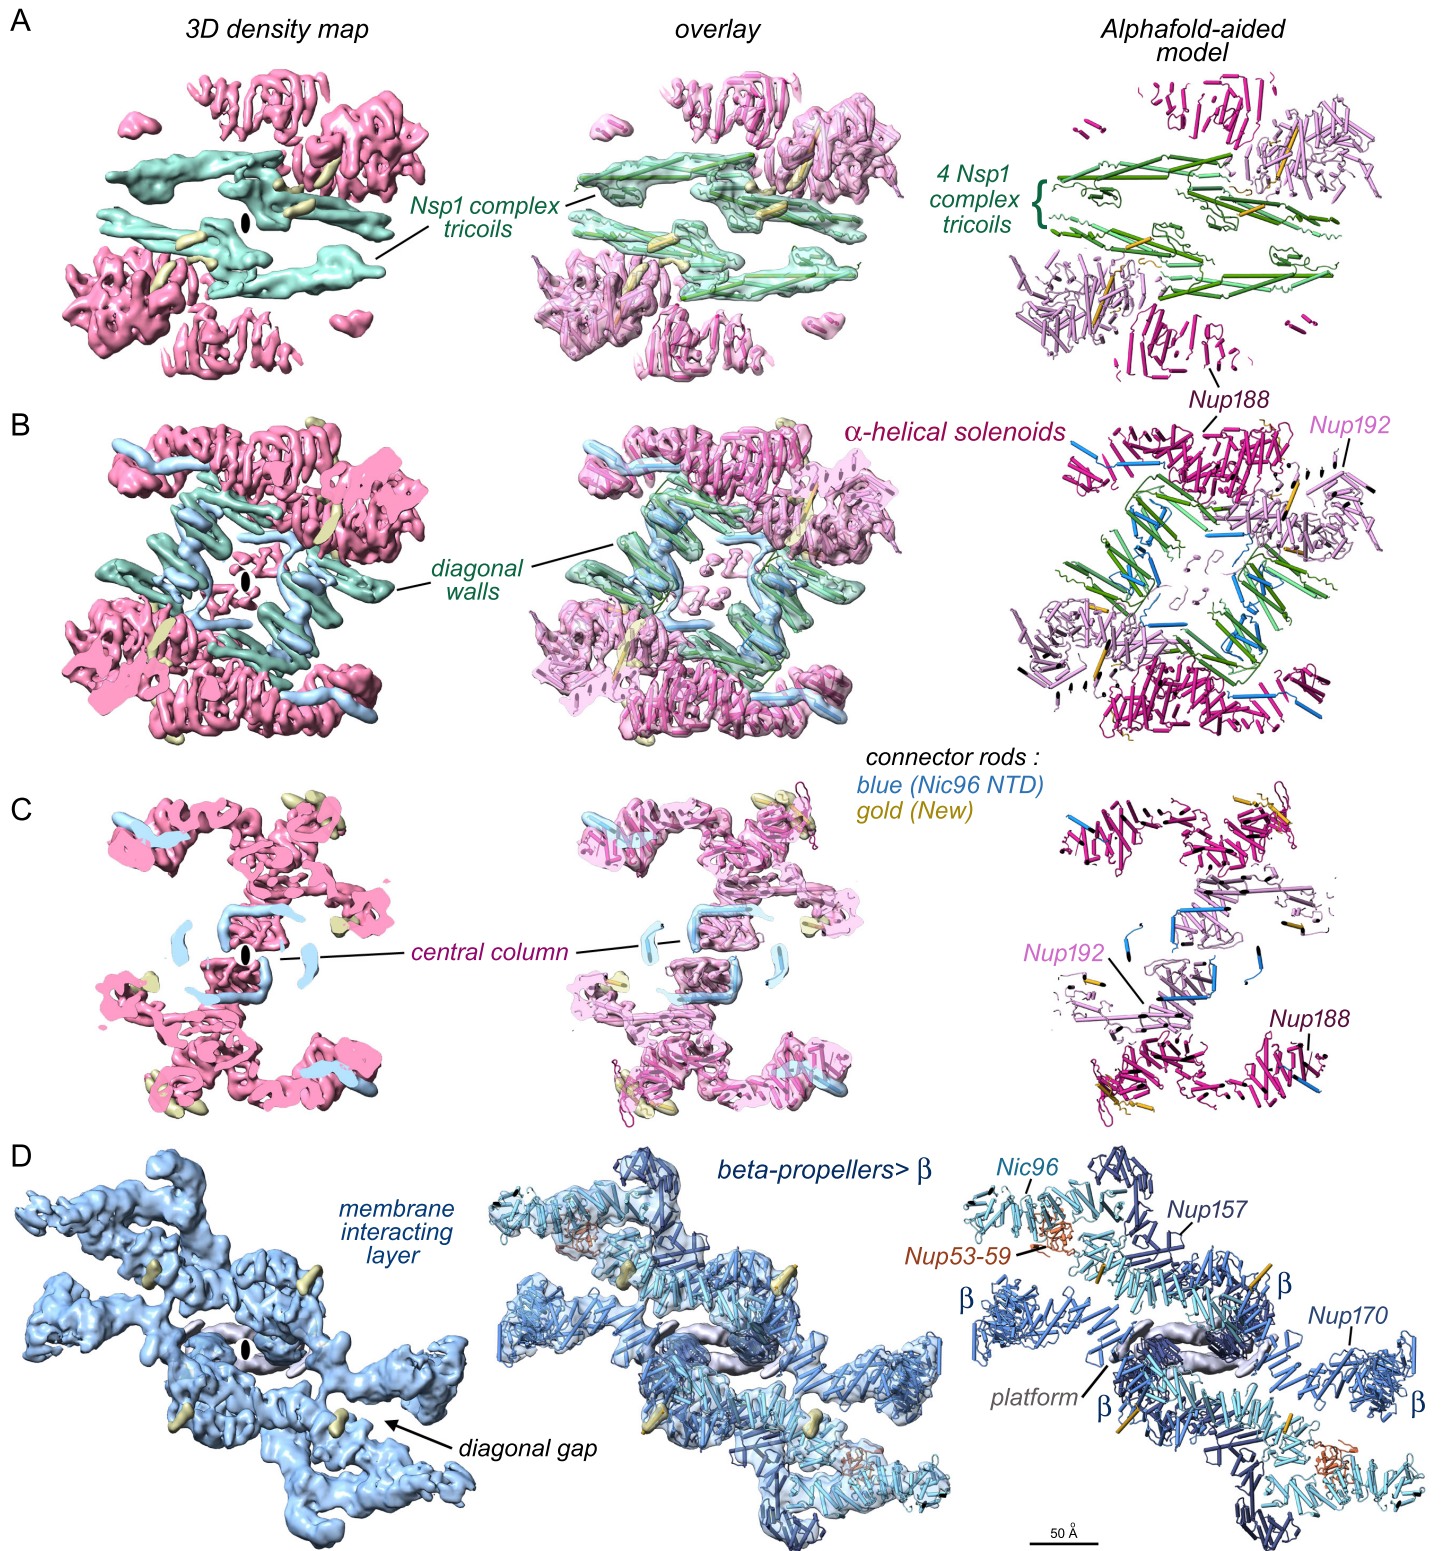

**Figure S4. Density map segmentation and docked models for Nups in three spoke layers, related to Figures 2,3.**

Sequential slabs are presented in each row starting from the central channel, while three columns provide different views for each slice including: an isosurface of the 3D density map, a semi-transparent view with docked Nups in cylinder and plank representation, and the molecular model. Nup color coding as in **Figure 2** including spoke connectors.

**(A)** Helical trimers of the Nsp1 complex (green) face into the central channel. The adaptin layer is in dark pink.

**(B)** Diagonal walls of  $\alpha$ -helices formed by the Nsp1 complex with Nic96 connectors.

**(C)** A central column is formed by Nup192 CTD tails with bound Nic96 connectors.

**(D)** Membrane interacting layers of each half spoke are tilted and associate weakly along their lateral surfaces; they contain bound connectors and Nup53-Nup59 heterodimers (coral).



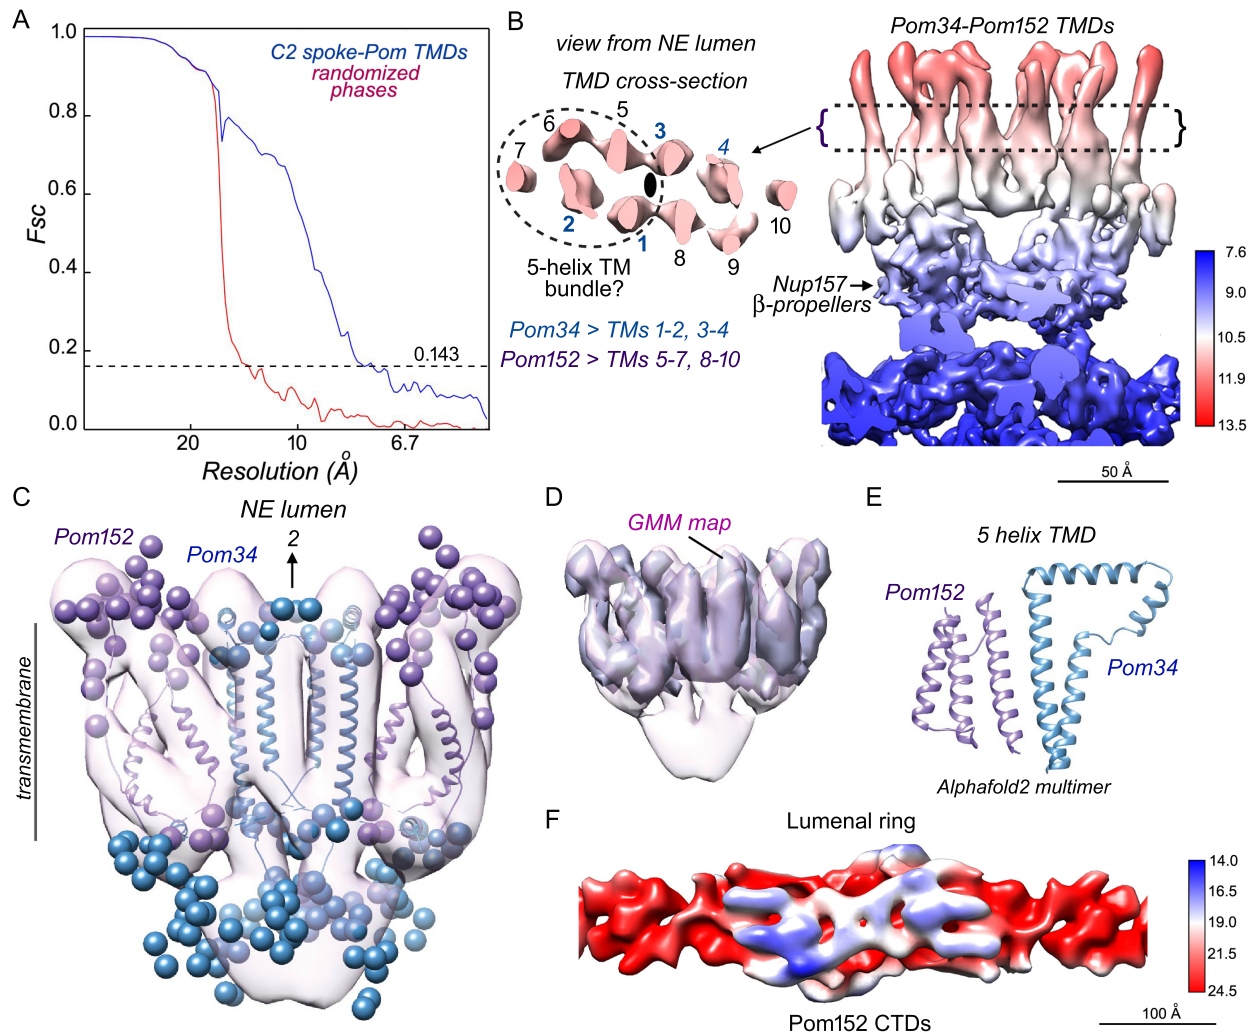

**Figure S5. Characterization of Pom34 and Pom152 TMDs and the luminal ring, related to Figure 4.**

**(A)** FSC curves for the Pom34-Pom152 TMDs and a closely opposed region of the spoke with C2 symmetry after refinement in RELION.

**(B)** Orthogonal slice (on the left) and side view of the Pom34- Pom152 TMDs.

**(C)** Integrative structure model of the Pom34- Pom152 TMDs: the structural ensemble is presented as a 3D localization probability density whose surface is rendered transparent for visual clarity. Two-fold symmetry was applied to compute the model.

**(D)** Superposition of the model 3D localization probability density (purple, transparent) and the 3D GMM density map (solid).

**(E)** AlphaFold2-multimer prediction for the Pom34- Pom152 TMDs.

**(F)** Two repeats of the luminal ring centered on the central spoke 2-fold axis and viewed from the NE lumen.

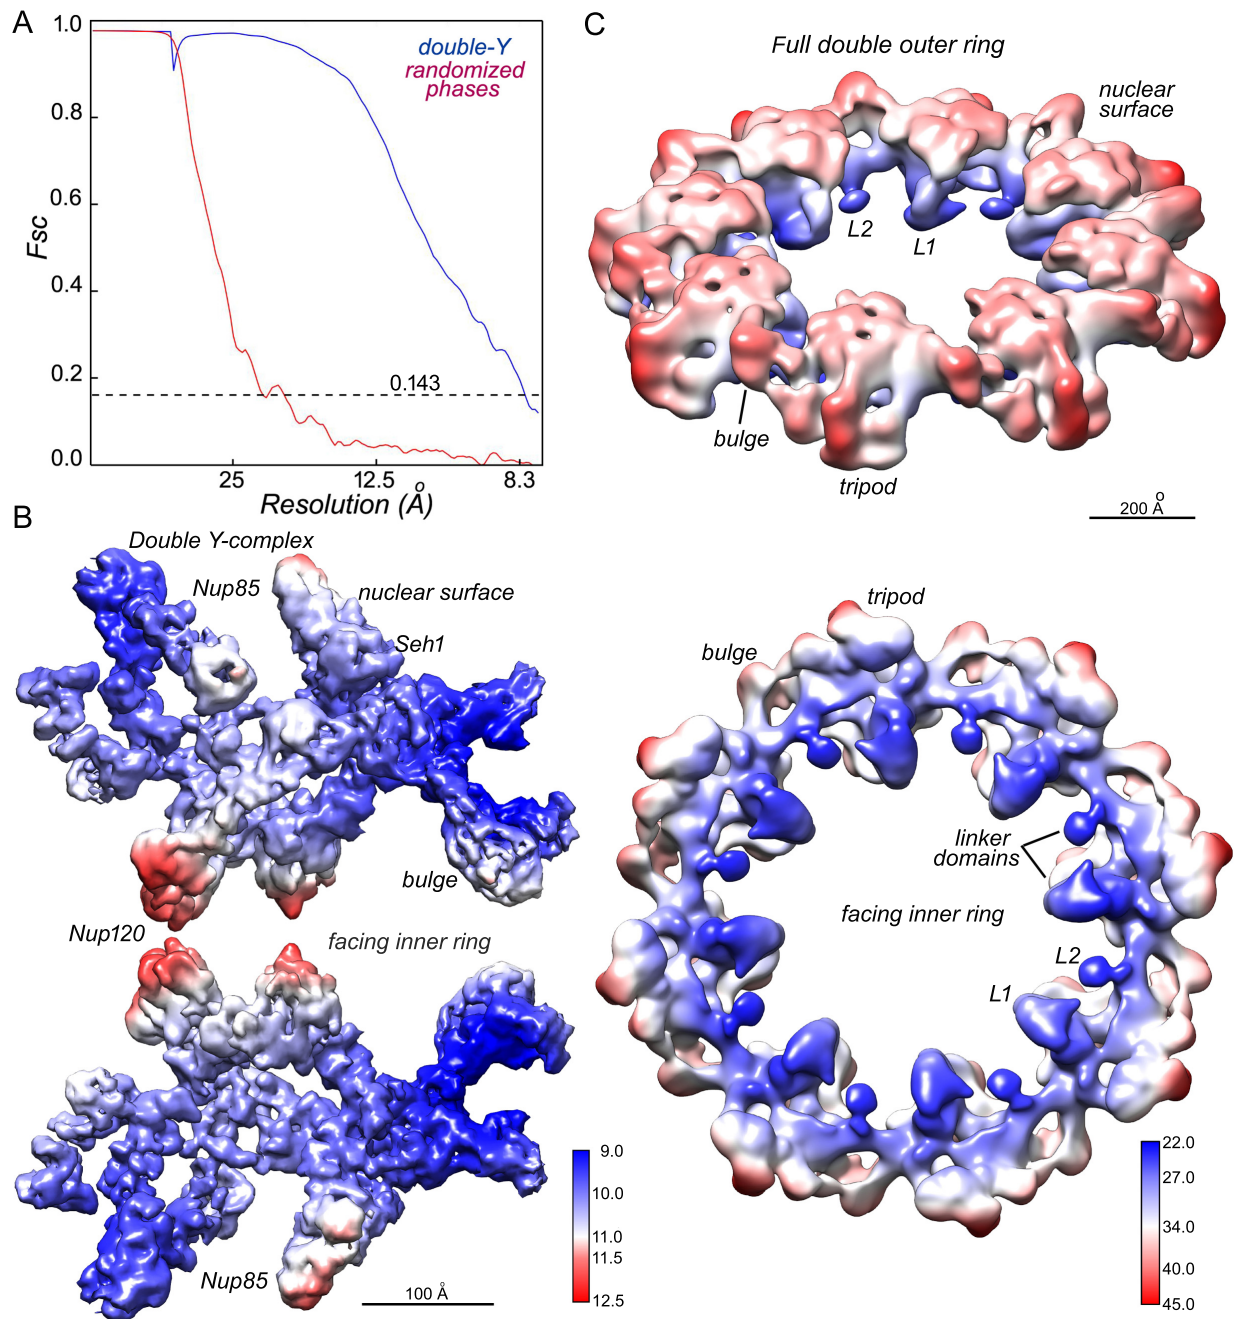

**Figure S6. Resolution of double Y-complexes and full double outer ring, related to Figure 5.**

**(A)** FSC plot for Nup84 double Y-complex protomer analyzed with CryoSPARC. Blue curve - masked FSC, Red curve - phase randomized and masked FSC.

**(B)** A local resolution 3D density map for the double Y-complex protomer with two views related by a 180 degree flip about the X-axis.

**(C)** (top) A tilted side view is shown for the local resolution 3D density map of the full double outer ring. (bottom) A view from the inner ring.

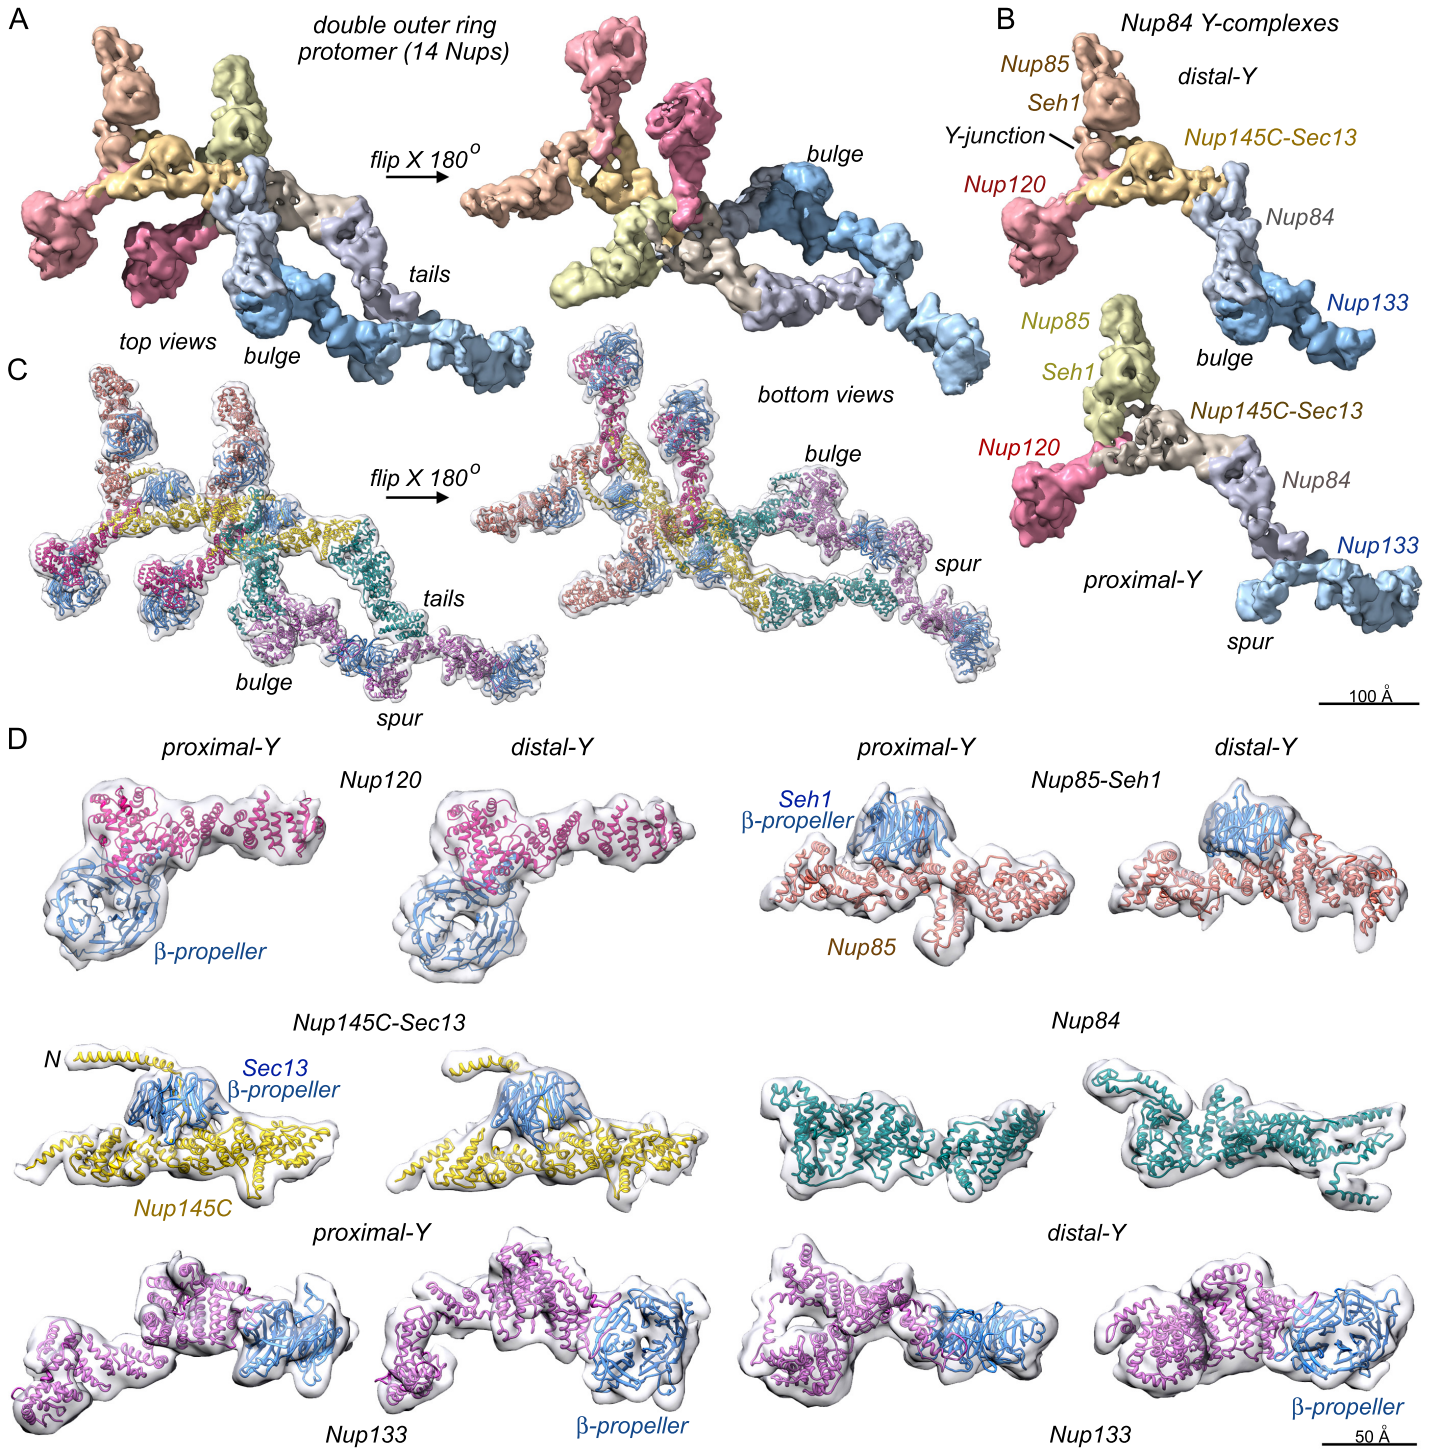

**Figure S7. Density map segmentation and model fitting for Nup84 Y-complexes in the nuclear double outer ring, related to Figure 5.**

**(A)** Segmented 3D density map for Nups in the double Y-complex. (left) View from the nucleus, (right) view from the inner ring.

**(B)** Single Nup84 Y-complexes are offset vertically from their relative positions in the protomer of double Y-complexes and are viewed from the nuclear interior. Individual Nups and notable features are labeled.

**(C)** Nearly complete models for Nup84 complexes in the double-Y protomer. Molecular ribbons are color-coded as in panel D.

**(D)** Individual 3D maps of Nups within the two Nup84 Y-complexes are shown with docked models. (Rows 1 and 2) Nups from the proximal and distal Y-complex are shown side by side. (Bottom row) Two distinctive views are shown for Nup133 from both the proximal and distal Y-complex.

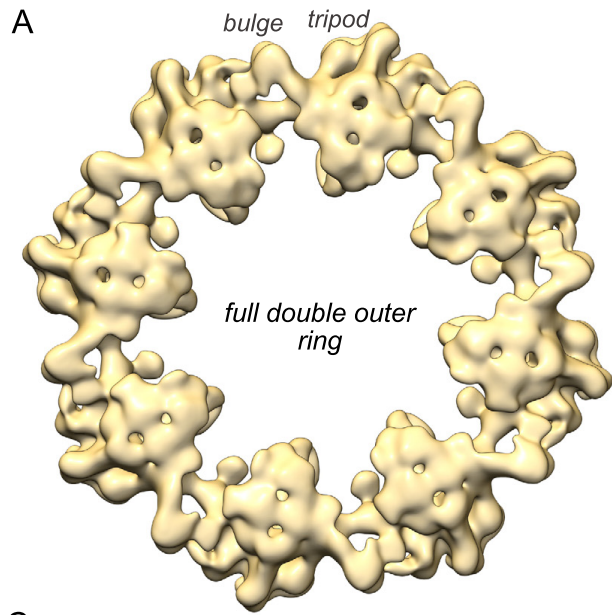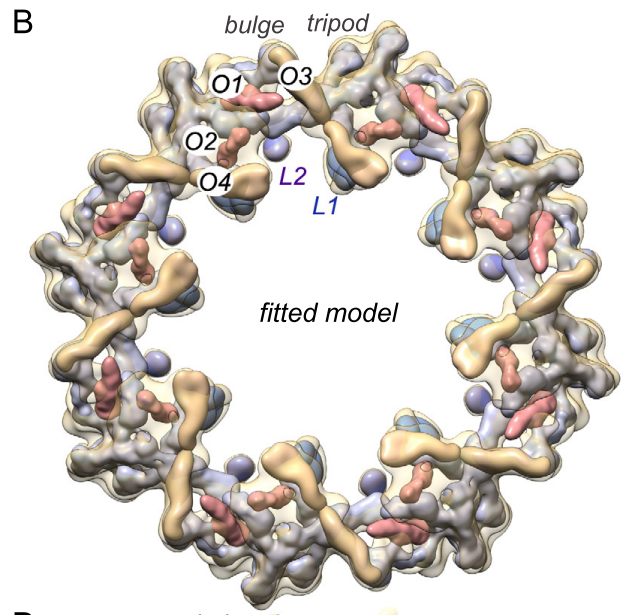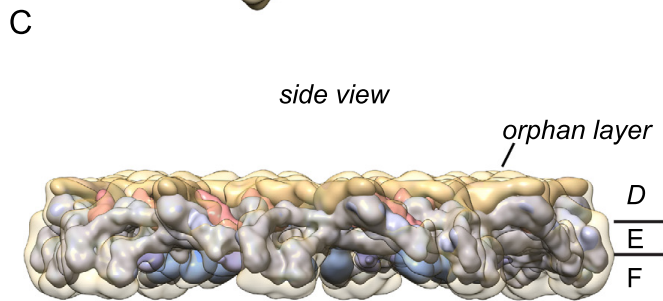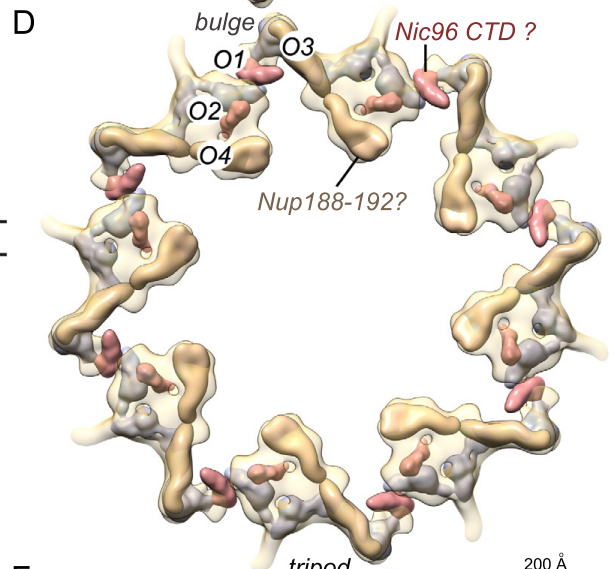

orphans, linkers and Y-complexes

■ Nic96 CTD? ■ Nup188-192 ? ■ double outer ring Y-complexes

■ L1 linker domain ■ L2 linker domain

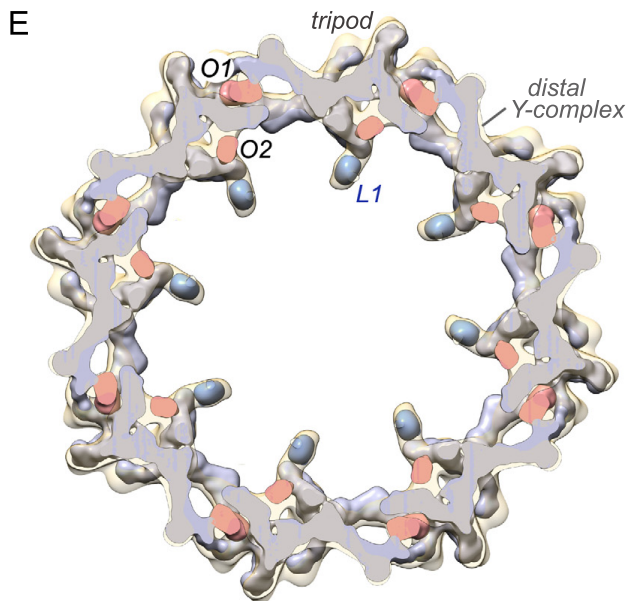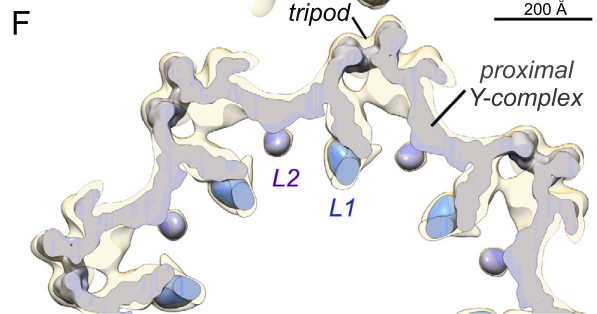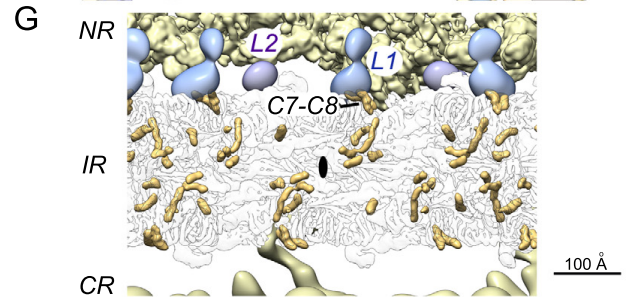

**Figure S8. Modeling the full double outer ring on the nuclear side of the yeast NPC, related to Figure 5.**

**(A)** Nuclear view of the full double outer ring refined with C8 symmetry.

**(B)** Fitted 3D model for the full double outer ring with color-coded components (see color key in panel C). Orphans (O1-O4) and linker domains (L1, L2) are labeled.

**(C)** Side view of the full double outer ring. The positions are indicated for thick slabs visualized in panels D, E and F.

**(D)** Top slab showing density features for the putative Nic96-CTD and Nup188-192 orphans, along with the double ring of Y-complexes (low pass filtered to 20Å resolution, in grey), docked in a transparent map of the full outer ring (in gold).

**(E)** Mid level slab showing fits for the double Y-complex, along with Nic96 CTDs and Linker domain 1.

**(F)** Half ring view of a density slab adjacent to the inner ring that contains the ring of double Y-complexes and both linker domains.

**(G)** The relationship between new connectors in the inner ring and the L1 linker domain is shown. Additional labels: nuclear double outer ring (NR), inner ring (IR) and cytoplasmic outer ring (CR).

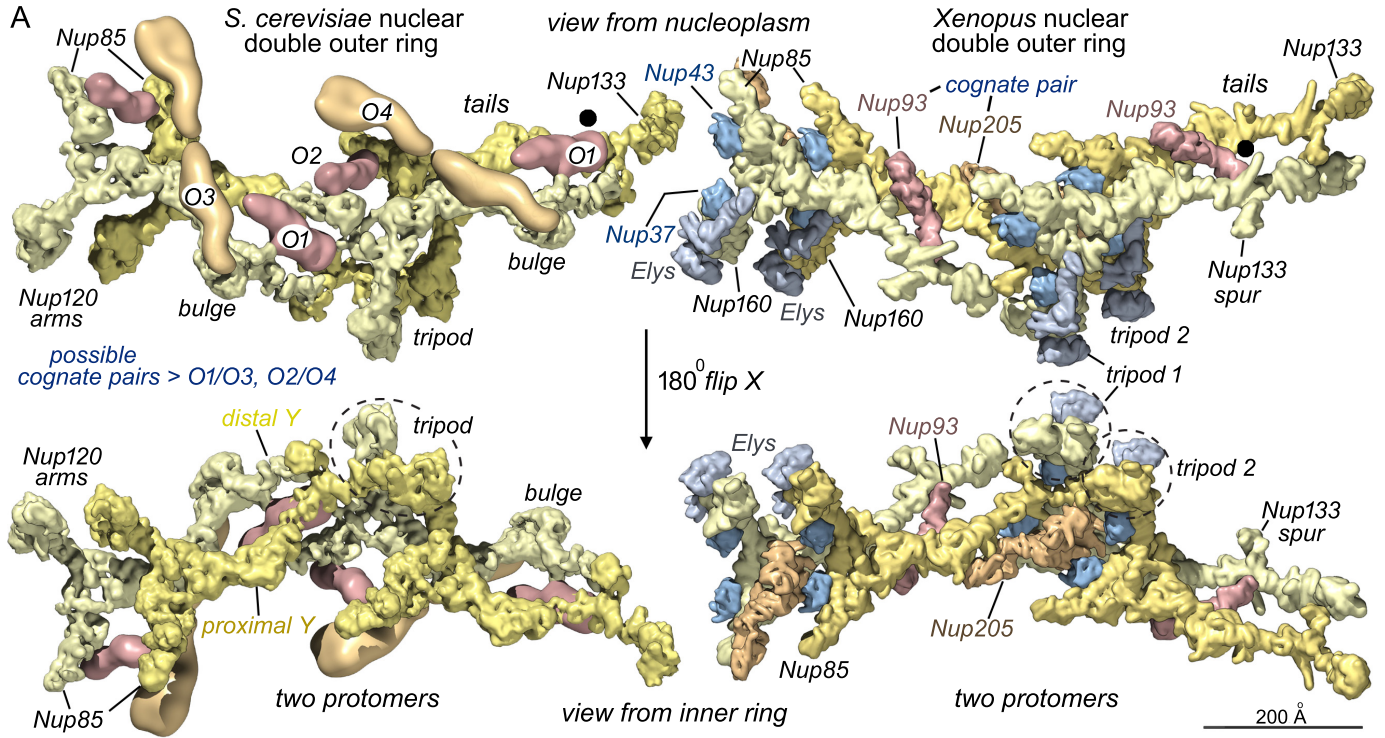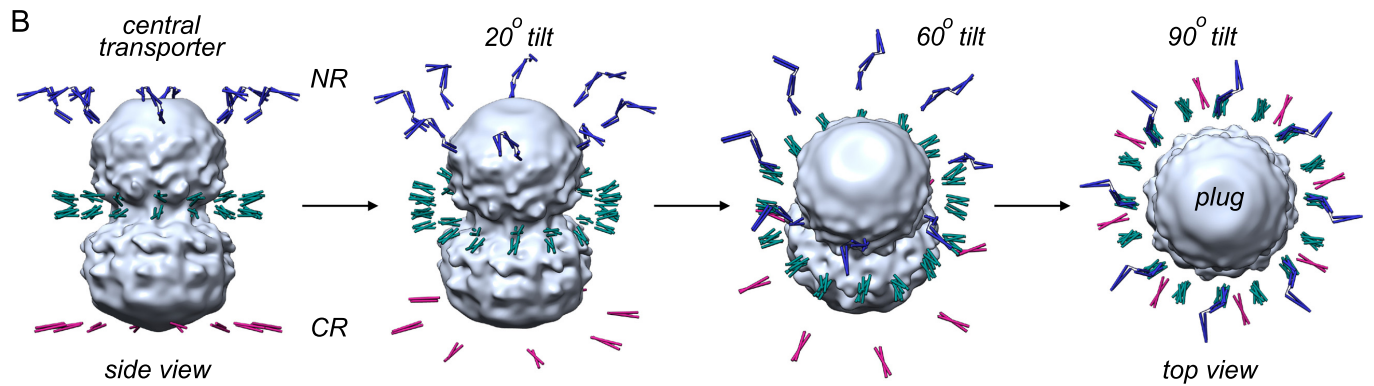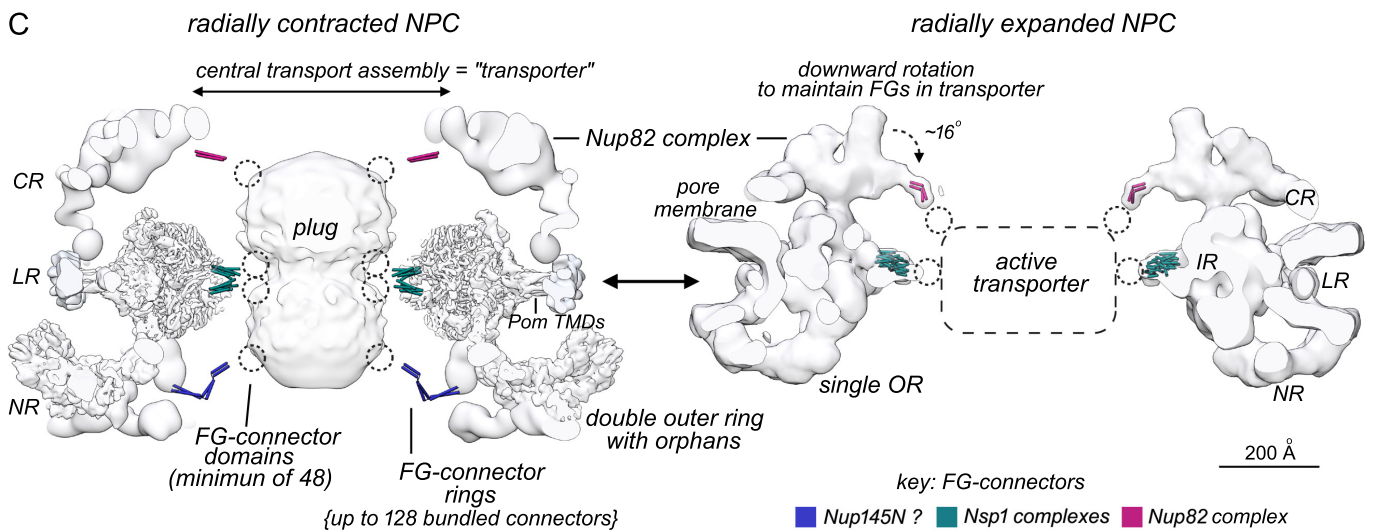

**Figure S9. Configuration of double Y-complex protomers and distribution of FG-connectors in the central channel of the NPC, related to Figures 5,6,7.**

**(A)**(left) Y-complexes in two protomers from the nuclear double outer ring of yeast NPCs are shown as segmented 3D maps with associated orphans that may arise from cognate Nic96/Nup188-192 pairs. A single tripod membrane binding site is formed at the interface between protomers (8 per double ring). (right) Two protomers from the nuclear double outer ring of *Xenopus* NPCs (7WB4.pdb)<sup>32</sup> are represented as smoothed 3D maps. Two closely-spaced, membrane binding tripods are formed at the interface between adjacent protomers with 16 tripods per double ring. Each  $\beta$ -propeller in a tripod contains an MBM to interact with the NE.

**(B)** A rotation series is shown for the central transporter/plug with associated FG-connectors (color key in **Figure 6C**).

**(C)** (left) Central cross-section of the composite model of a radially-contracted, Form II yeast NPC with color coded FG-connector rods. (right) Cross-section from a 3D density map of the Form I yeast NPC imaged *in situ* (EMD 24258)<sup>7</sup> with a diagram of the central transporter (dashed box) based on channel density from a 3D map of the *in situ* human NPC <sup>21</sup>.



**Table S1. Single particle data processing and modeling of the yeast NPC and sub-assemblies, related to Figures 1-6.**

| Data collection                              | Single particle analysis               |                                                   |
|----------------------------------------------|----------------------------------------|---------------------------------------------------|
| Microscope                                   | Titan-Krios-GIF                        |                                                   |
| Detector/Energy Filter Slit                  | K2 Summit/20e                          |                                                   |
| Image mode                                   | Super-resolution counting              |                                                   |
| Frames                                       | 40                                     |                                                   |
| Total electron dose ( $e^- / \text{\AA}^2$ ) | 40.0                                   |                                                   |
| Nominal pixel size ( $\text{\AA}$ )          | 2.66                                   |                                                   |
| Defocus range ( $\mu\text{m}$ )              | 1.5 to -3.8                            |                                                   |
| Movies (after triage)                        | 4015 (3218)                            |                                                   |
| NPCs/protomers after cleaning                | 26049 /208392                          |                                                   |
| <b>Sub-assembly</b>                          | <b>Spoke<br/>(inner ring protomer)</b> | <b>Nuclear outer ring<br/>(Double-Y protomer)</b> |
| 3D reconstruction                            | Multibody                              | Multibody                                         |
| Symmetry imposed                             | C1 (C2 post)                           | C1                                                |
| Software                                     | RELION 3.0.7 and CryoSPARC             | RELION 3.0.7 and CryoSPARC                        |
| final protomers                              | 208392                                 | 29655                                             |
| Nominal pixel size ( $\text{\AA}$ )          | 2.66                                   | 3.99                                              |
| Map resolution ( $\text{\AA}$ )              | 6.6                                    | 8.1                                               |
| -masked FSC 0.143                            |                                        |                                                   |
| Local resolution range ( $\text{\AA}$ )      | 6.5-9.5                                | 9-12.5                                            |
| B-factor ( $\text{\AA}^2$ )                  | -300                                   | -600 (ad hoc)                                     |
| <b>Modeling</b>                              |                                        |                                                   |
| Software-                                    | Chimera, Coot, MDFF                    | Chimera, Coot, MDFF                               |
| NPC component Ordered mass (MDa) /protomer   | Full spoke<br>1.89                     | N-ring: double Y-complex<br>1.02                  |
| Number of Nucleoporins                       | 28                                     | 14                                                |
| Chimera map cross-correlation                | 0.9                                    | 0.84                                              |
| EMDB/RCSB codes†                             | EMD-41300 / PDB 8TJ5                   | EMD-41285 / PDB 8TIE                              |

**Table S1 continued**

| Sub-assembly                        | Additional sub-assembly maps     |                                                |                                   |                        |                                         |
|-------------------------------------|----------------------------------|------------------------------------------------|-----------------------------------|------------------------|-----------------------------------------|
|                                     | Pom34-Pom152 anchors             | Bridges to central transporter (full NPC maps) | Luminal ring                      | Full double outer ring | single outer ring                       |
| details                             | membrane attachment site         | cytoplasmic Map 1 / nuclear Map 2              | Map 1 / Map 2                     | nuclear side           | cytoplasmic side                        |
| 3D reconstruction                   | Multibody and focused refinement | Global refinement after 3D classification      | Multibody                         | Global refinement      | Focused global refinement and Multibody |
| Symmetry imposed                    | C1 (C2 post)                     | C8/C8                                          | C1 (C2 post)/<br>D8, C1 (C2 post) | C8                     | C8 / C1                                 |
| Software                            | RELION 3.0.7                     | RELION 3.0.7                                   | RELION 3.0.7                      | RELION 3.0.7           | RELION 3.0.7                            |
| final protomers                     | 208392                           | 41120/11304                                    | 85322 / 341952                    | 41120                  | 41120 / 34576                           |
| Nominal pixel size (Å)              | 2.66                             | 5.32 / 3.99                                    | 5.32                              | 3.99                   | 3.99                                    |
| Map resolution (Å)-masked FSC 0.143 | 9.4                              | 31.4 / 29.5                                    | 14.7/~20                          | 23.0                   | 30 / 22                                 |
| Resolution range (Å)                | 10.5-12                          | 37-43 / 35-43                                  | 14-24 / 22-25                     | 23-39                  | 2-44 / 22-38                            |
|                                     | (Pom/TMDs)                       |                                                |                                   |                        |                                         |
| B-factor (Å <sup>2</sup> )          | -800                             | -1000 / -1000                                  | -300 / -1000                      | -1000                  | -1000 / -1000                           |
| EMDB/RCSB codes†                    | EMD-41117 / PDB 8T9L             | EMD-41122 / EMD-41121                          | EMD-41116                         | EMD-41114              | EMD-41119                               |

†Composite, multiscale 3D density maps for the yeast NPC (EMD-41123) and density map for the NPC with central transporter-plug (EMD-41120).

**Table S2. Modeling the inner ring spoke and double Y-complex in the nuclear outer ring of the yeast NPC, related to Figures 2, 5.**

| <i>Components</i>                                  | <i>PDB/AlphaFold models (residues)</i>                                                                                                            | <i>Maps &amp; Template PDBs</i> |
|----------------------------------------------------|---------------------------------------------------------------------------------------------------------------------------------------------------|---------------------------------|
| <b>Spoke (inner ring)</b>                          | 28 Nucleoporins                                                                                                                                   | EMD-24232 / 7N85                |
| Nsp1 complexes (4 copies)                          | PDB 7N85                                                                                                                                          |                                 |
| Nup53/59 heterodimer (2)                           | PDB 7N85                                                                                                                                          |                                 |
| Nic96 NTD (4)                                      | PDB 7N85 (15-166, 15-173)                                                                                                                         |                                 |
| Nic96 CTD (4)                                      | AF_AFP34077F1 (190-839, 198-839)                                                                                                                  |                                 |
| Nup157 (2)                                         | AF_AFP40064F1 (78-1391)                                                                                                                           |                                 |
| Nup170 (2)                                         | AF_AFP38181F1 (81-1326)                                                                                                                           |                                 |
| Nup188 (2)                                         | AF_AFP52593F1 (15-1655)                                                                                                                           |                                 |
| Nup192 (2)                                         | AF_AFP47054F1 (1-1683)                                                                                                                            |                                 |
| Total residues modeled<br>New/ previous (7N85.pdb) | 17536 / 15584                                                                                                                                     |                                 |
| Structural features :<br>New/previous (7N85.pdb)   | $\alpha$ -helices 744/611 :: $\beta$ -propellers 4/4<br>connectors 18 <sup>†</sup> /28 total: 46                                                  |                                 |
| <b>Double Y-complex (outer ring)</b>               | 14 Nucleoporins                                                                                                                                   | EMD-24231 / 7N84                |
| Nup120 (2 copies)                                  | AF_AFP35729F1 (1-1037)                                                                                                                            | 4XMM (Y-junction)               |
| Nup85 (2)                                          | AF_AFP46673F1 (66-744)                                                                                                                            | 3EWE, 4XMM (Y-junction)         |
| Seh1 (2)                                           | AF_AFP53011F1 (1-349)                                                                                                                             | 3EWE                            |
| Nup145C (2)                                        | AF_AFP49687F1 (102-711, 113-711)                                                                                                                  | 3JRO, 4XMM (Y-junction)         |
| Sec13 (2)                                          | AF_AFQ04491F1 (8-293)                                                                                                                             | 3JRO                            |
| Nup84 (2)                                          | AF_AFP52891F1 (1-726)                                                                                                                             | 3JRO                            |
| Nup133 (2)                                         | AF_AFP36161F1 (1-1157)                                                                                                                            |                                 |
| Total residues modeled<br>New/ previous (7N84.pdb) | 9479 / 9092                                                                                                                                       |                                 |
| Structural features<br>New/previous (7N84.pdb)     | $\alpha$ -helices 341/324 :: $\beta$ -propellers 8/8                                                                                              |                                 |
| Totals                                             | $\alpha$ -helices 1085 :: $\beta$ -propellers 12<br>residues 27015/protomer :: mass 2.92 MDa<br>(no cytoplasmic outer ring, TMDs or luminal ring) |                                 |

<sup>†</sup> At the current resolution, most new connectors modeled as helices with a few strands but higher resolution is needed to identify their secondary structure.

#### References:

- 3EWE : Brohawn, S.G., Leksa, N.C., Spear, E.D., Rajashankar, K.R., Schwartz, T.U. (2008) Science 322: 1369-1373.  
3JRO : Brohawn, S.G., Schwartz, T.U. (2009) Nat Struct Mol Biol 16: 1173-1177.  
4XMM : Stuwe, T., Correia, A.R., Lin, D.H., Paduch, M., Lu, V.T., Kossiakoff, A.A., Hoelz, A. (2015) Science 347: 1148-1152.  
AlphaFold models: Jumper, J. et al. (2021). Highly accurate protein structure prediction with AlphaFold. Nature 596: 583–589.

**Table S3. Orphan spoke connectors from Nup145N and Nup53 in a half spoke, related to Figure 3.**

| connector | partner                           | identity       | PDB and comments                                                                                            |
|-----------|-----------------------------------|----------------|-------------------------------------------------------------------------------------------------------------|
| C1        | Nup57-Nsp1                        | unknown        | ~15 residue $\alpha$ -helix and extended chain faces into central channel                                   |
| C2        | Nsp1-Nup57                        | unknown        | ~13 residue extended chain                                                                                  |
| C3        | Nup192-NTD                        | Nup145N        | <a href="#">7MVV</a> : displaced 11 extended residues                                                       |
| C4        | Nup192-NTD                        | unknown        | ~35 residue $\alpha$ -helix in crook of Nup192-NTD                                                          |
| C5        | Nup192-NTD-Nup57                  | unknown        | ~17 residues                                                                                                |
| C6        | Nup170 $\alpha$ -helical solenoid | Nup145N        | <a href="#">5HB0</a> : ~25 residue bent $\alpha$ -helix                                                     |
| C7        | Nup188                            | Nup145N        | <a href="#">7MVZ</a> : ~22 residue $\alpha$ -helix and extended chain Adjacent to SH3-like domain in Nup188 |
| C8        | Nup188                            | Likely Nup145N | ~37 residues in bent $\alpha$ -helix, adjacent to C6 Adjacent to SH3-like domain in Nup188                  |
| C9        | Nic96-CTD innermost copy          | Nup53          | <a href="#">5HB3</a> : ~17 residue $\alpha$ -helix                                                          |

**Table S4. Summary of the Pom34-Pom152 tetramer integrative structure modeling, related to Figure 4.**

|                                                                                                                                                                                                                                                                                                                                                                                                    |                                                                                                                                                                                                                                                                                                                                                                                                                                                                                                                                                                                                                                                                                                                                                                                                                                                                                                              |
|----------------------------------------------------------------------------------------------------------------------------------------------------------------------------------------------------------------------------------------------------------------------------------------------------------------------------------------------------------------------------------------------------|--------------------------------------------------------------------------------------------------------------------------------------------------------------------------------------------------------------------------------------------------------------------------------------------------------------------------------------------------------------------------------------------------------------------------------------------------------------------------------------------------------------------------------------------------------------------------------------------------------------------------------------------------------------------------------------------------------------------------------------------------------------------------------------------------------------------------------------------------------------------------------------------------------------|
| <p>1) Gathering information</p> <p>Prior models</p> <p>Physical principles and statistical preferences</p> <p>Experimental data</p>                                                                                                                                                                                                                                                                | <p>2-fold symmetry derived from cryo-EM structure</p> <p>Excluded volume</p> <p>Sequence connectivity</p> <p>14 DSSO</p> <p>Atomic structure prediction from AlphaFold2 (AF_Q12445, AF_P39685)</p>                                                                                                                                                                                                                                                                                                                                                                                                                                                                                                                                                                                                                                                                                                           |
| <p>2) Representing the system</p> <p>Composition (number of copies)</p> <p>Atomic (structured) components</p> <p>Unstructured components</p> <p>Resolution of structured components</p> <p>Resolution of unstructured components</p> <p>Structural coverage</p> <p>Rigid body (RB) definitions</p> <p>Resolution of disordered regions</p> <p>Spatial restraints encoded into scoring function</p> | <p>4</p> <p>Pom152: 105-130, 144-167, 176-192, 200-212, 105-130, 144-167, 176-192, 200-212</p> <p>Pom34: 44-86, 89-110, 122-150, 222-237, 44-86, 89-110, 122-150, 222-237</p> <p>Pom152: 1-104, 131-143, 168-175, 193-199, 213-250, 1-104, 131-143, 168-175, 193-199, 213-250</p> <p>Pom34: 1-43, 87-88, 111-121, 151-221, 238-250, 1-43, 87-88, 111-121, 151-221, 238-250</p> <p>1 [R1] residue per bead</p> <p>2 [R2] residues per bead</p> <p>37.76 %</p> <p>RB1: Pom152<sub>105-130</sub></p> <p>RB2: Pom152<sub>144-167</sub></p> <p>RB3: Pom152<sub>176-192</sub></p> <p>RB4: Pom152<sub>200-212</sub></p> <p>RB5: Pom34<sub>44-86</sub></p> <p>RB6: Pom34<sub>89-110</sub></p> <p>2 [R2] residues per bead</p> <p>Excluded volume; applied to the R1 representation</p> <p>Sequence connectivity; applied to the R1 representation</p> <p>Cross-link restraints; applied to the R1 representation</p> |
| <p>3) Structural Sampling</p> <p>Sampling method</p> <p>Replica exchange temperature range</p> <p>Number of replicas</p> <p>Number of runs</p> <p>Number of structures generated</p>                                                                                                                                                                                                               | <p>Replica Exchange Gibbs sampling, based on Metropolis Monte Carlo</p> <p>1.0 - 4.0</p> <p>6</p> <p>80</p> <p>6400000</p>                                                                                                                                                                                                                                                                                                                                                                                                                                                                                                                                                                                                                                                                                                                                                                                   |

**Table S4 continued**

|                                                                                                                                                                                                                                                                                                                                  |                                                                                                                                                                                                                                                            |
|----------------------------------------------------------------------------------------------------------------------------------------------------------------------------------------------------------------------------------------------------------------------------------------------------------------------------------|------------------------------------------------------------------------------------------------------------------------------------------------------------------------------------------------------------------------------------------------------------|
| Movers for flexible string of bead<br>CPU time                                                                                                                                                                                                                                                                                   | Random translation up to 4.0 Å<br>22 hours on 80 processors                                                                                                                                                                                                |
| 4) Validating the Pom34-Pom152 models<br>Models selected for validation<br>Number of models after equilibration<br>Number of models that satisfy the input information<br>Number of structures in samples A/B<br>p-value of non-parametric Kolmogorov-Smirnov two-sample test<br>Kolmogorov-Smirnov two-sample test statistic, D | 6400000<br>7089<br>2378/4711<br>0.539 (threshold p-value > 0.05)<br>0.0                                                                                                                                                                                    |
| Thoroughness of the structural sampling<br>Sampling precision<br>Homogeneity of proportions $\chi^2$ test (p-value)/Cramers V value<br>Number of clusters<br>Cluster populations<br>Cluster precisions<br>Average cross-correlation between localization probability densities of samples A and B                                | 14.08 Å<br>1.000/0.000 (thresholds: p-value > 0.05 OR Cramer's V < 0.1)<br>1<br>cluster 1 : 100.0 %<br>cluster 1 : 9.52 Å<br>cluster 1: 0.78                                                                                                               |
| Validation by information used for modeling<br>Percent of sequence connectivity restraints satisfied per structure<br>Percent cross-link restraints satisfied by ensemble<br>Percent of excluded volume restraints satisfied per structure                                                                                       | 99 %<br>99 %<br>99 %                                                                                                                                                                                                                                       |
| 5) Software and data availability<br>Software<br>Modeling programs<br><br>Modeling scripts<br>Structure prediction<br>Visualization and plotting Data<br>Data deposition                                                                                                                                                         | IMP PMI module, version develop-1350fc67f7<br>Integrative Modeling Platform (IMP), version develop-1350fc67f7<br><a href="https://github.com/integrativemodeling/NPC-TMD">https://github.com/integrativemodeling/NPC-TMD</a><br>AlphaFold2<br>UCSF Chimera |
|                                                                                                                                                                                                                                                                                                                                  | PDBDEV_00000213                                                                                                                                                                                                                                            |

**Table S5. Notable orphans, linkers and lateral contacts in the yeast double outer ring, related to Figure 5.**

| <i>Components</i>                                                                                                                | <i>Partners</i>                                                                    | <i>Comments</i>                                                                                                            |
|----------------------------------------------------------------------------------------------------------------------------------|------------------------------------------------------------------------------------|----------------------------------------------------------------------------------------------------------------------------|
| <b>Orphans</b>                                                                                                                   |                                                                                    |                                                                                                                            |
| Nup188-192 (O3)<br>Nic96CTD (O1)                                                                                                 | distal Nup145C/Nup84<br>distal Nup133/<br>proximal Nup84                           | May stabilize distal Nup84 Y-complex<br>Located between tails in double-Y                                                  |
| Nup188-192 (O4)<br>Nic96CTD (O2)                                                                                                 | Nup188-192/linker 1<br>proximal Nup85/<br>distal Seh1                              | Orient linker 1 ?<br>Located between two Nup85 arms                                                                        |
| <b>Linker domains</b>                                                                                                            |                                                                                    |                                                                                                                            |
| Linker 1                                                                                                                         | Nup188-192(O4)-proximal<br>Nup85 to Nup188 (IR)                                    | Links double ring to inner ring, sits above<br>SH3-like domain in Nup188 of the spoke                                      |
| Linker 2                                                                                                                         | proximal Nup145C/Nup84<br>to Nup53/Nup59 (IR)                                      | Links double ring to inner ring                                                                                            |
| <b>Contacts</b>                                                                                                                  |                                                                                    |                                                                                                                            |
| <b>Intra Y-complex contacts<br/>in the protomer</b>                                                                              |                                                                                    |                                                                                                                            |
|                                                                                                                                  | (amino acid residues)                                                              |                                                                                                                            |
| distal Nup145C (112-124)<br>proximal Nup145C (102-112)<br>distal Nup84 (406-726)                                                 | distal Nup85 (621-623)<br>proximal Nup85 (622-623)<br>distal Nup133 (705-1157)     | Connects Y-stem to Nup84 arm<br>Connects Y-stem to Nup84 arm<br>Forms novel bulge in distal Y-complex                      |
| <b>Inter Y-complex contacts<br/>In the protomer</b>                                                                              |                                                                                    |                                                                                                                            |
| distal Nup133 beta propeller<br>(51-482)                                                                                         | proximal Nup133 spur<br>(941-1157)                                                 | Major contact between adjacent tails in<br>double Y-complex                                                                |
| <b>Contacts between double Y-<br/>complexes in the outer ring</b>                                                                |                                                                                    |                                                                                                                            |
| proximal Nup133 helical<br>solenoid and beta propeller<br>(multiple sites)<br>proximal Nup84 (610-612)<br>proximal Nup84 (51-63) | proximal and distal Nup120<br><br>distal Nup85 (601-616)<br>distal Nup85 (295-302) | Major double Y complex contact sites in ring<br>Tripod membrane interaction site<br><br>Align Nup85 arm<br>Align Nup85 arm |

**Figure S6. Nucleoporin FG repeats in the central transport channel of the yeast NPC, related to Figures 6,7.**

| Nucleoporins/NPC<br>from C- to N-side<br>(number of copies) |      | FG repeat<br>residues | Total amino<br>acids | Mass for FG repeats<br>approximate |
|-------------------------------------------------------------|------|-----------------------|----------------------|------------------------------------|
| Nup42                                                       | (8)  | 364                   | 2912                 | $0.28 \times 10^6$                 |
| Nsp1                                                        | (16) | 590                   | 9440                 | $1.00 \times 10^6$                 |
| Nup159                                                      | (16) | 876                   | 14016                | $1.51 \times 10^6$                 |
| Nup116                                                      | (16) | 686                   | 10976                | $1.18 \times 10^6$                 |
| Nup100                                                      | (16) | 570                   | 9120                 | $0.98 \times 10^6$<br>~4.9 MDa     |
|                                                             |      |                       |                      |                                    |
| Nsp1                                                        | (32) | 590                   | 18880                | $2.00 \times 10^6$                 |
| Nup49                                                       | (32) | 236                   | 7522                 | $0.81 \times 10^6$                 |
| Nup57                                                       | (32) | 220                   | 7040                 | $0.76 \times 10^6$<br>~3.6 MDa     |
|                                                             |      |                       |                      |                                    |
| Nup145N                                                     | (16) | 209                   | 3344                 | $0.36 \times 10^6$                 |
| Nup1                                                        | (8)  | 695                   | 5560                 | $0.6 \times 10^6$                  |
| Nup60                                                       | (8)  | ~100                  | 800                  | $0.09 \times 10^6$<br>~1.1 MDa     |
|                                                             |      |                       |                      | Sum ~9.6 MDa                       |
